# Supplementary material
Source: Springer Nature journal article supplement (https://www.springermedizin.de/resource/supplementary/12958_2014_1204_MOESM2_ESM.pdf/9567046)

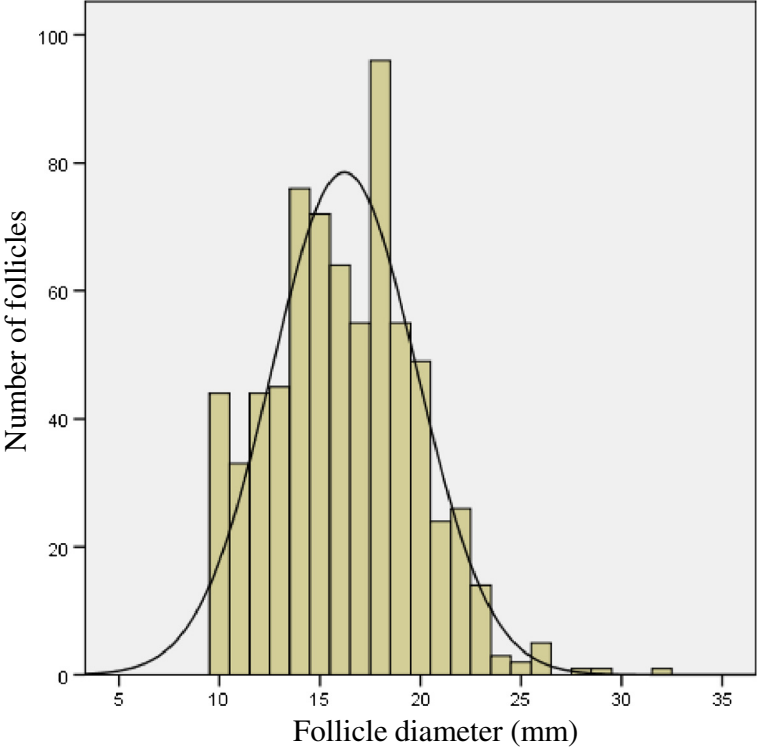

Supplement: MOESM2 [file 9567046]
